# Supplementary material
Source: Springer Nature journal article supplement (https://www.springermedizin.de/resource/supplementary/13012_2011_363_MOESM1_ESM.pdf/9629870)
Supplement: MOESM1 [file 9629870]

# Systems of support

GPs  
Nurses  
Community matrons  
Psychiatrists  
Podiatrists  
Pharmacists  
Diabetologists  
Rheumatologists  
Cardiologists  
Neurologists  
Physiotherapists

**Health professionals**

**Non-health professionals**  
with health related and health relevant functions

Health trainers  
Social prescribers  
Community wardens  
Traditional healers  
Faith healers  
Spiritualists  
Herbalists  
Social workers  
Religious or spiritual leaders  
Managers, teachers

**People with LTCs**

**Voluntary and community groups**  
with health related and health relevant functions

**Personal communities**

Support groups  
Lunch/Tea clubs  
Internet-based discussion groups  
Religious groups  
Ethnic groups  
Sports groups  
Other social groups

Spouse/Partner  
Children  
Grandchildren  
Parents  
Siblings  
Other relatives  
Friends  
Pets  
Neighbours  
Colleagues  
Classmates  
Acquaintances
